# Supplementary material
Source: PubMed Central journal article supplement (PMC5905371)
Supplement: zox005_supplementary_material.pdf [file zox005_supplementary_material.pdf]

## SUPPLEMENTARY MATERIAL

### Factors affecting the spatial distribution and breeding habitat of an insular cliff-nesting raptor community

*Current Zoology* (2017) - DOI: 10.1093/cz/zox005.

Beneharo Rodríguez<sup>1,\*</sup>, Airam Rodríguez<sup>1,2</sup>, Felipe Siverio<sup>1</sup> and Manuel Siverio<sup>1</sup>

<sup>1</sup> *Canary Islands' Ornithology and Natural History Group (GOHNIC), La Malecita s/n, 38480 Buenavista del Norte, Tenerife, Canary Islands, Spain*

<sup>2</sup> *Department of Evolutionary Ecology, Estación Biológica de Doñana (CSIC), Avda. Américo Vespucio s/n, 41092 Seville, Spain*

\*corresponding author.

**Table S1.** Mean ( $\pm$ SD) nearest neighbour distances (in km) of cliff-nesting raptors and the common raven in Teno, Tenerife, Canary Islands (Np = *Neophron percnopterus*, Bb = *Buteo buteo*, Ph = *Pandion haliaetus*, Ft = *Falco tinnunculus*, Fp = *Falco peregrinus*, Cc = *Corvus corax*).

| Sp                     | Np              | Bb              | Ph              | Ft              | Fp              | Cc              |
|------------------------|-----------------|-----------------|-----------------|-----------------|-----------------|-----------------|
| <i>N. percnopterus</i> | 0.83 $\pm$ 0.42 | 1.44 $\pm$ 0.73 | 3.26 $\pm$ 3.27 | 0.28 $\pm$ 0.18 | 0.81 $\pm$ 0.31 | 1.99 $\pm$ 3.02 |
| <i>B. buteo</i>        | 2.51 $\pm$ 1.42 | 1.12 $\pm$ 0.56 | 6.88 $\pm$ 3.11 | 0.48 $\pm$ 0.41 | 2.13 $\pm$ 1.25 | 5.17 $\pm$ 3.35 |
| <i>P. haliaetus</i>    | 0.95 $\pm$ 0.39 | 2.32 $\pm$ 0.36 | 1.48 $\pm$ 1.29 | 0.36 $\pm$ 0.23 | 0.56 $\pm$ 0.30 | 0.96 $\pm$ 0.24 |
| <i>F. tinnunculus</i>  | 1.85 $\pm$ 1.47 | 1.17 $\pm$ 0.78 | 5.47 $\pm$ 3.68 | 0.41 $\pm$ 0.21 | 1.80 $\pm$ 1.26 | 3.59 $\pm$ 3.39 |
| <i>F. peregrinus</i>   | 1.09 $\pm$ 0.92 | 1.45 $\pm$ 0.85 | 4.18 $\pm$ 3.67 | 0.22 $\pm$ 0.17 | 1.95 $\pm$ 0.56 | 2.24 $\pm$ 3.13 |
| <i>C. corax</i>        | 0.64 $\pm$ 0.64 | 1.58 $\pm$ 0.68 | 2.62 $\pm$ 2.08 | 0.33 $\pm$ 0.17 | 0.78 $\pm$ 0.20 | 1.34 $\pm$ 0.55 |

**Table S2.** Results of the pairwise permutation tests ( $n = 9999$ ) of the different variables employed to describe habitat feature of nesting sites of cliff-nesting raptors and the common raven in Teno, Tenerife, Canary Islands.

### Cliff height

| Comparison                                              | W      | P value | P adjust |
|---------------------------------------------------------|--------|---------|----------|
| <i>Buteo buteo</i> - <i>Corvus corax</i>                | 0.260  | 0.798   | 0.887    |
| <i>Buteo buteo</i> - <i>Falco peregrinus</i>            | -2.662 | 0.006   | 0.028    |
| <i>Buteo buteo</i> - <i>Falco tinnunculus</i>           | 2.231  | 0.025   | 0.062    |
| <i>Buteo buteo</i> - <i>Neophron percnopterus</i>       | -0.086 | 0.933   | 0.933    |
| <i>Corvus corax</i> - <i>Falco peregrinus</i>           | -1.974 | 0.049   | 0.098    |
| <i>Corvus corax</i> - <i>Falco tinnunculus</i>          | 1.022  | 0.086   | 0.143    |
| <i>Corvus corax</i> - <i>Neophron percnopterus</i>      | -0.449 | 0.689   | 0.861    |
| <i>Falco peregrinus</i> - <i>Falco tinnunculus</i>      | 4.215  | 0.004   | 0.028    |
| <i>Falco peregrinus</i> - <i>Neophron percnopterus</i>  | 2.258  | 0.019   | 0.062    |
| <i>Falco tinnunculus</i> - <i>Neophron percnopterus</i> | -1.693 | 0.114   | 0.163    |

### Altitude

| Comparison                                              | W      | P value | P adjust |
|---------------------------------------------------------|--------|---------|----------|
| <i>Buteo buteo</i> - <i>Corvus corax</i>                | 1.353  | 0.181   | 0.452    |
| <i>Buteo buteo</i> - <i>Falco peregrinus</i>            | 2.199  | 0.026   | 0.110    |
| <i>Buteo buteo</i> - <i>Falco tinnunculus</i>           | 3.312  | 0.001   | 0.009    |
| <i>Buteo buteo</i> - <i>Neophron percnopterus</i>       | 2.096  | 0.033   | 0.110    |
| <i>Corvus corax</i> - <i>Falco peregrinus</i>           | 1.024  | 0.318   | 0.635    |
| <i>Corvus corax</i> - <i>Falco tinnunculus</i>          | 0.518  | 0.611   | 0.775    |
| <i>Corvus corax</i> - <i>Neophron percnopterus</i>      | 0.493  | 0.635   | 0.775    |
| <i>Falco peregrinus</i> - <i>Falco tinnunculus</i>      | -0.278 | 0.775   | 0.775    |
| <i>Falco peregrinus</i> - <i>Neophron percnopterus</i>  | -0.748 | 0.462   | 0.770    |
| <i>Falco tinnunculus</i> - <i>Neophron percnopterus</i> | -0.286 | 0.774   | 0.775    |

### Distance to the nearest house

| Comparison                                              | W      | P value | P adjust |
|---------------------------------------------------------|--------|---------|----------|
| <i>Buteo buteo</i> - <i>Corvus corax</i>                | -4.065 | 0.000   | 0.000    |
| <i>Buteo buteo</i> - <i>Falco peregrinus</i>            | -4.520 | 0.000   | 0.000    |
| <i>Buteo buteo</i> - <i>Falco tinnunculus</i>           | -0.988 | 0.329   | 0.412    |
| <i>Buteo buteo</i> - <i>Neophron percnopterus</i>       | -4.741 | 0.000   | 0.000    |
| <i>Corvus corax</i> - <i>Falco peregrinus</i>           | -0.793 | 0.441   | 0.490    |
| <i>Corvus corax</i> - <i>Falco tinnunculus</i>          | 2.842  | 0.007   | 0.012    |
| <i>Corvus corax</i> - <i>Neophron percnopterus</i>      | 0.294  | 0.785   | 0.785    |
| <i>Falco peregrinus</i> - <i>Falco tinnunculus</i>      | 4.331  | 0.000   | 0.000    |
| <i>Falco peregrinus</i> - <i>Neophron percnopterus</i>  | 1.313  | 0.197   | 0.281    |
| <i>Falco tinnunculus</i> - <i>Neophron percnopterus</i> | -3.357 | 0.002   | 0.003    |

### Distance to the nearest road

| Comparison                                              | W      | P value | P adjust |
|---------------------------------------------------------|--------|---------|----------|
| <i>Buteo buteo</i> - <i>Corvus corax</i>                | -4.972 | 0.000   | 0.000    |
| <i>Buteo buteo</i> - <i>Falco peregrinus</i>            | -3.918 | 0.000   | 0.000    |
| <i>Buteo buteo</i> - <i>Falco tinnunculus</i>           | -1.662 | 0.097   | 0.139    |
| <i>Buteo buteo</i> - <i>Neophron percnopterus</i>       | -4.505 | 0.000   | 0.000    |
| <i>Corvus corax</i> - <i>Falco peregrinus</i>           | 0.467  | 0.665   | 0.665    |
| <i>Corvus corax</i> - <i>Falco tinnunculus</i>          | 3.773  | 0.001   | 0.002    |
| <i>Corvus corax</i> - <i>Neophron percnopterus</i>      | 1.222  | 0.226   | 0.282    |
| <i>Falco peregrinus</i> - <i>Falco tinnunculus</i>      | 3.266  | 0.002   | 0.003    |
| <i>Falco peregrinus</i> - <i>Neophron percnopterus</i>  | 0.485  | 0.635   | 0.665    |
| <i>Falco tinnunculus</i> - <i>Neophron percnopterus</i> | -3.184 | 0.002   | 0.004    |

### Steepness

| Comparison                                              | W      | P value | P adjust |
|---------------------------------------------------------|--------|---------|----------|
| <i>Buteo buteo</i> - <i>Corvus corax</i>                | -3.737 | 0.000   | 0.000    |
| <i>Buteo buteo</i> - <i>Falco peregrinus</i>            | -3.515 | 0.000   | 0.000    |
| <i>Buteo buteo</i> - <i>Falco tinnunculus</i>           | 1.235  | 0.217   | 0.271    |
| <i>Buteo buteo</i> - <i>Neophron percnopterus</i>       | -3.060 | 0.002   | 0.003    |
| <i>Corvus corax</i> - <i>Falco peregrinus</i>           | 0.519  | 0.622   | 0.622    |
| <i>Corvus corax</i> - <i>Falco tinnunculus</i>          | 3.752  | 0.000   | 0.000    |
| <i>Corvus corax</i> - <i>Neophron percnopterus</i>      | 1.421  | 0.162   | 0.231    |
| <i>Falco peregrinus</i> - <i>Falco tinnunculus</i>      | 3.710  | 0.000   | 0.000    |
| <i>Falco peregrinus</i> - <i>Neophron percnopterus</i>  | 0.942  | 0.356   | 0.395    |
| <i>Falco tinnunculus</i> - <i>Neophron percnopterus</i> | -3.505 | 0.000   | 0.000    |

### Habitat diversity (Shannon Index)

| Comparison                                              | W      | P value | P adjust |
|---------------------------------------------------------|--------|---------|----------|
| <i>Buteo buteo</i> - <i>Corvus corax</i>                | 0.390  | 0.706   | 0.883    |
| <i>Buteo buteo</i> - <i>Falco peregrinus</i>            | -0.203 | 0.852   | 0.947    |
| <i>Buteo buteo</i> - <i>Falco tinnunculus</i>           | 0.938  | 0.351   | 0.827    |
| <i>Buteo buteo</i> - <i>Neophron percnopterus</i>       | 1.248  | 0.207   | 0.827    |
| <i>Corvus corax</i> - <i>Falco peregrinus</i>           | -0.530 | 0.603   | 0.861    |
| <i>Corvus corax</i> - <i>Falco tinnunculus</i>          | 0.060  | 0.954   | 0.954    |
| <i>Corvus corax</i> - <i>Neophron percnopterus</i>      | 0.587  | 0.564   | 0.861    |
| <i>Falco peregrinus</i> - <i>Falco tinnunculus</i>      | 0.822  | 0.413   | 0.827    |
| <i>Falco peregrinus</i> - <i>Neophron percnopterus</i>  | 1.165  | 0.256   | 0.827    |
| <i>Falco tinnunculus</i> - <i>Neophron percnopterus</i> | 0.962  | 0.342   | 0.827    |

**Table S3.** Candidate models for estimating the probability of occupation of nest sites and using the nearest neighbour distances (NND) as explanatory variables.

**Common Buzzard**

| Model | Degree of freedom | logLik | AICc   | Delta | Weight |
|-------|-------------------|--------|--------|-------|--------|
| 23    | 3                 | -93.08 | 192.26 | 0.00  | 0.45   |
| 2     | 2                 | -94.32 | 192.68 | 0.42  | 0.37   |
| 123   | 4                 | -92.96 | 194.08 | 1.82  | 0.18   |

Term codes: common buzzard = 1; Raven = 2; common kestrel = 3

**Common Kestrel**

| Model  | Degree of freedom | logLik  | AICc   | Delta | Weight |
|--------|-------------------|---------|--------|-------|--------|
| (Null) | 1                 | -129.15 | 260.31 | 0.00  | 0.43   |
| 1      | 2                 | -128.79 | 261.63 | 1.32  | 0.22   |
| 2      | 2                 | -128.96 | 261.96 | 1.65  | 0.19   |
| 3      | 2                 | -129.10 | 262.24 | 1.93  | 0.16   |

Term codes: common buzzard = 1; raven = 2; Barbary falcon = 3

**Barbary Falcon**

| Model | Degree of freedom | logLik | AICc  | Delta | Weight |
|-------|-------------------|--------|-------|-------|--------|
| 24    | 3                 | -38.82 | 83.75 | 0.00  | 0.21   |
| 234   | 4                 | -37.86 | 83.89 | 0.14  | 0.20   |
| 14    | 3                 | -39.01 | 84.11 | 0.36  | 0.18   |
| 4     | 2                 | -40.08 | 84.20 | 0.45  | 0.17   |
| 124   | 4                 | -38.29 | 84.74 | 0.99  | 0.13   |
| 1234  | 5                 | -37.40 | 85.05 | 1.30  | 0.11   |

Term codes: common buzzard = 1; raven = 2; Barbary falcon = 3; common kestrel = 4

**Common Raven**

| Model | Degree of freedom | logLik | AICc  | Delta | Weight |
|-------|-------------------|--------|-------|-------|--------|
| 13    | 3                 | -32.18 | 70.46 | 0.00  | 0.24   |
| 23    | 3                 | -32.25 | 70.59 | 0.13  | 0.22   |
| 123   | 4                 | -31.62 | 71.41 | 0.95  | 0.15   |
| 3     | 2                 | -33.78 | 71.60 | 1.14  | 0.14   |
| 134   | 4                 | -31.78 | 71.71 | 1.25  | 0.13   |
| 234   | 4                 | -31.80 | 71.75 | 1.29  | 0.13   |

Term codes: common buzzard = 1; raven = 2; Barbary falcon = 3; common kestrel = 4

**Table S4.** Results of the multimodel inference models for abundance of territories and number of species of cliff-nesting raptors and common raven in Teno, Tenerife, Canary Islands. In bold variables that represent maximum importance (sum of weight of evidence [w] = 1).

**Abundance (all species)**

| Model-averaged coefficients     | Importance | Estimate | Std. Error | Lower CI | Upper CI |
|---------------------------------|------------|----------|------------|----------|----------|
| (Intercept)                     | -          | -0.5164  | 0.3626     | -1.233   | 0.201    |
| <b>Land covered by forests</b>  | 1          | -0.0117  | 0.0050     | -0.022   | -0.002   |
| <b>Land covered by grasses</b>  | 1          | -0.0196  | 0.0096     | -0.039   | -0.001   |
| <b>Mean altitude</b>            | 1          | -0.0008  | 0.0003     | -0.001   | 0.000    |
| <b>Mean Slope</b>               | 1          | 0.0278   | 0.0075     | 0.013    | 0.043    |
| <b>Habitat diversity</b>        | 1          | 1.5268   | 0.6258     | 0.290    | 2.764    |
| <b>Land covered by shrubs</b>   | 1          | 0.0102   | 0.0041     | 0.002    | 0.018    |
| Land covered by urbanized areas | 0.64       | -0.0204  | 0.0121     | -0.044   | 0.004    |
| Mean Curvature                  | 0.40       | 0.8853   | 0.7152     | -0.529   | 2.300    |

**Abundance (excluding Egyptian vulture)**

| Model-averaged coefficients     | Importance | Estimate | Std. Error | Lower CI | Upper CI |
|---------------------------------|------------|----------|------------|----------|----------|
| (Intercept)                     | -          | -0.5512  | 0.3667     | -1.276   | 0.174    |
| <b>Land covered by forests</b>  | 1          | -0.0107  | 0.0051     | -0.021   | -0.001   |
| Land covered by grasses         | 0.83       | -0.0176  | 0.0096     | -0.036   | 0.001    |
| <b>Mean altitude</b>            | 1          | -0.0007  | 0.0003     | -0.001   | 0.000    |
| <b>Mean Slope</b>               | 1          | 0.0263   | 0.0078     | 0.011    | 0.042    |
| <b>Habitat diversity</b>        | 1          | 1.4635   | 0.6450     | 0.189    | 2.738    |
| <b>Land covered by shrubs</b>   | 1          | 0.0097   | 0.0042     | 0.001    | 0.018    |
| Land covered by urbanized areas | 0.54       | -0.0185  | 0.0120     | -0.042   | 0.005    |
| Mean Curvature                  | 0.17       | 0.6199   | 0.7590     | -0.881   | 2.121    |

**Abundance (excluding common kestrel)**

| Model-averaged coefficients     | Importance | Estimate | Std. Error | Lower CI | Upper CI |
|---------------------------------|------------|----------|------------|----------|----------|
| (Intercept)                     | -          | -3.5885  | 0.8277     | -5.221   | -1.956   |
| Land covered by forests         | 0.12       | 0.0041   | 0.0057     | -0.007   | 0.015    |
| Land covered by grasses         | 0.51       | -0.0286  | 0.0225     | -0.073   | 0.016    |
| Mean altitude                   | 0.53       | -0.0009  | 0.0006     | -0.002   | 0.000    |
| <b>Mean Slope</b>               | 1          | 0.0832   | 0.0143     | 0.055    | 0.111    |
| <b>Habitat diversity</b>        | 1          | 2.5987   | 1.0460     | 0.532    | 4.665    |
| Land covered by shrubs          | 0.19       | 0.0047   | 0.0064     | -0.008   | 0.017    |
| Land covered by urbanized areas | 0.93       | -0.0952  | 0.0571     | -0.208   | 0.018    |
| Mean Curvature                  | 0.06       | 0.7201   | 1.1458     | -1.546   | 2.986    |

**Abundance (excluding Egyptian vulture and common kestrel)**

| Model-averaged coefficients     | Importance | Estimate | Std. Error | Lower CI | Upper CI |
|---------------------------------|------------|----------|------------|----------|----------|
| (Intercept)                     | -          | -4.5668  | 0.8443     | -6.234   | -2.900   |
| Land covered by forests         | 0.41       | 0.0089   | 0.0058     | -0.003   | 0.020    |
| Land covered by grasses         | 0.12       | -0.0210  | 0.0220     | -0.064   | 0.022    |
| Mean altitude                   | 0.21       | -0.0007  | 0.0007     | -0.002   | 0.001    |
| <b>Mean Slope</b>               | 1          | 0.0904   | 0.0164     | 0.058    | 0.123    |
| <b>Habitat diversity</b>        | 1          | 3.3370   | 1.0932     | 1.176    | 5.498    |
| Land covered by shrubs          | 0          | -        | -          | -        | -        |
| Land covered by urbanized areas | 0.77       | -0.0817  | 0.0565     | -0.193   | 0.030    |
| Mean Curvature                  | 0.08       | -0.7915  | 1.3752     | -3.511   | 1.928    |

**Abundance of common kestrel**

| Model-averaged coefficients     | Importance | Estimate | Std. Error | Lower CI | Upper CI |
|---------------------------------|------------|----------|------------|----------|----------|
| (Intercept)                     | -          | -0.3148  | 0.4162     | -1.136   | 0.506    |
| <b>Land covered by forests</b>  | 1          | -0.0281  | 0.0077     | -0.043   | -0.013   |
| Land covered by grasses         | 0.89       | -0.0203  | 0.0108     | -0.042   | 0.001    |
| Mean altitude                   | 0.67       | -0.0005  | 0.0003     | -0.001   | 0.000    |
| Mean Slope                      | 0.66       | 0.0165   | 0.0095     | -0.002   | 0.035    |
| Habitat diversity               | 0.69       | 1.5006   | 0.7583     | 0.002    | 2.999    |
| Land covered by shrubs          | 0.86       | 0.0115   | 0.0055     | 0.001    | 0.022    |
| Land covered by urbanized areas | 0.28       | -0.0151  | 0.0123     | -0.039   | 0.009    |
| Mean Curvature                  | 0.22       | 1.1253   | 0.9158     | -0.686   | 2.936    |

**Richness (all species)**

| Model-averaged coefficients     | Importance | Estimate | Std. Error | Lower CI | Upper CI |
|---------------------------------|------------|----------|------------|----------|----------|
| (Intercept)                     | -          | -0.4765  | 0.2663     | -1.003   | 0.050    |
| Land covered by forests         | 0.15       | -0.0036  | 0.0038     | -0.011   | 0.004    |
| Land covered by grasses         | 0.11       | -0.0063  | 0.0102     | -0.026   | 0.014    |
| <b>Mean altitude</b>            | 1          | -0.0010  | 0.0003     | -0.002   | 0.000    |
| <b>Mean Slope</b>               | 1          | 0.0428   | 0.0073     | 0.028    | 0.057    |
| Habitat diversity               | 0.10       | 0.1976   | 0.5662     | -0.922   | 1.317    |
| Land covered by shrubs          | 0.14       | 0.0031   | 0.0033     | -0.004   | 0.010    |
| Land covered by urbanized areas | 0.13       | -0.0096  | 0.0126     | -0.035   | 0.015    |
| Mean Curvature                  | 0.10       | 0.4458   | 0.8935     | -1.321   | 2.212    |

**Richness (excluding Egyptian vulture)**

| Model-averaged coefficients     | Importance | Estimate | Std. Error | Lower CI | Upper CI |
|---------------------------------|------------|----------|------------|----------|----------|
| (Intercept)                     | -          | -0.4329  | 0.2781     | -0.9824  | 0.1166   |
| Land covered by forests         | 0.14       | -0.0003  | 0.0017     | -0.0101  | 0.0051   |
| Land covered by grasses         | 0.13       | -0.0008  | 0.0042     | -0.0261  | 0.0142   |
| <b>Mean altitude</b>            | 1          | -0.0010  | 0.0003     | -0.0016  | -0.0004  |
| <b>Mean Slope</b>               | 1          | 0.0394   | 0.0074     | 0.0249   | 0.0539   |
| Habitat diversity               | 0.14       | 0.0508   | 0.2483     | -0.7670  | 1.5194   |
| Land covered by shrubs          | 0.13       | 0.0003   | 0.0014     | -0.0046  | 0.0089   |
| Land covered by urbanized areas | 0.15       | -0.0014  | 0.0059     | -0.0344  | 0.0154   |
| Mean Curvature                  | 0          | -        | -          | -        | -        |

**Table S5.** Candidate models for abundance of territories and number of species of cliff-nesting raptors and raven in Teno, Tenerife, Canary Islands.

**Abundance (all species)**

| Model    | Degree of freedom | logLik  | AICc   | Delta | Weight |
|----------|-------------------|---------|--------|-------|--------|
| 1235678  | 8                 | -209.13 | 435.33 | 0     | 0.38   |
| 12345678 | 9                 | -208.36 | 436.08 | 0.75  | 0.26   |
| 123567   | 7                 | -210.82 | 436.46 | 1.14  | 0.22   |
| 1234567  | 8                 | -210.11 | 437.29 | 1.96  | 0.14   |
| Null     | 1                 | -268.10 | 538.24 | -     | -      |

Term codes:

Land covered by forests = 1; Land covered by grasses = 2; Mean altitude = 3; Mean curvature = 4; Mean Slope = 5; Habitat diversity = 6; Land covered by shrubs = 7; Land covered by urbanized areas = 8

**Abundance (excluding Egyptian vulture)**

| Model    | Degree of freedom | logLik  | AICc   | Delta | Weight |
|----------|-------------------|---------|--------|-------|--------|
| 1235678  | 8                 | -206.33 | 429.74 | 0     | 0.38   |
| 123567   | 7                 | -207.73 | 430.30 | 0.56  | 0.28   |
| 13567    | 6                 | -209.34 | 431.29 | 1.55  | 0.17   |
| 12345678 | 9                 | -206.00 | 431.36 | 1.62  | 0.17   |
| Null     | 1                 | -133.49 | 269.02 | -     | -      |

Term codes:

Land covered by forests = 1; Land covered by grasses = 2; Mean altitude = 3; Mean curvature = 4; Mean Slope = 5; Habitat diversity = 6; Land covered by shrubs = 7; Land covered by urbanized areas = 8

**Abundance (excluding common kestrel)**

| Model  | Degree of freedom | logLik  | AICc   | Delta | Weight |
|--------|-------------------|---------|--------|-------|--------|
| 568    | 4                 | -98.71  | 205.70 | 0     | 0.15   |
| 23568  | 6                 | -96.56  | 205.73 | 0.03  | 0.15   |
| 3568   | 5                 | -97.69  | 205.82 | 0.12  | 0.14   |
| 2568   | 5                 | -97.83  | 206.10 | 0.40  | 0.12   |
| 56     | 3                 | -100.54 | 207.26 | 1.55  | 0.07   |
| 13568  | 6                 | -97.36  | 207.34 | 1.64  | 0.07   |
| 5678   | 5                 | -98.47  | 207.37 | 1.67  | 0.07   |
| 25678  | 6                 | -97.43  | 207.49 | 1.78  | 0.06   |
| 235678 | 7                 | -96.35  | 207.53 | 1.82  | 0.06   |
| 234568 | 7                 | -96.37  | 207.56 | 1.86  | 0.06   |
| 123568 | 7                 | -96.39  | 207.61 | 1.91  | 0.06   |
| Null   | 1                 | -133.49 | 269.02 | -     | -      |

Term codes:

Land covered by forests = 1; Land covered by grasses = 2; Mean altitude = 3; Mean curvature = 4; Mean Slope = 5; Habitat diversity = 6; Land covered by shrubs = 7; Land covered by urbanized areas = 8

**Abundance (excluding Egyptian vulture and common kestrel)**

| Model | Degree of freedom | logLik  | AICc   | Delta | Weight |
|-------|-------------------|---------|--------|-------|--------|
| 567   | 4                 | -86.54  | 181.37 | 0     | 0.20   |
| 1567  | 5                 | -85.70  | 181.84 | 0.48  | 0.16   |
| 156   | 4                 | -86.99  | 182.26 | 0.90  | 0.13   |
| 2567  | 5                 | -85.98  | 182.40 | 1.04  | 0.12   |
| 13567 | 6                 | -84.90  | 182.41 | 1.04  | 0.12   |
| 56    | 3                 | -88.29  | 182.74 | 1.38  | 0.10   |
| 3567  | 5                 | -86.29  | 183.02 | 1.65  | 0.09   |
| 4567  | 5                 | -86.37  | 183.17 | 1.80  | 0.08   |
| Null  | 1                 | -114.01 | 230.06 | -     | -      |

Term codes:

Land covered by forests = 1; Land covered by grasses = 2; Mean altitude = 3; Mean curvature = 4; Mean Slope = 5; Habitat diversity = 6; Land covered by urbanized areas = 7

**Abundance of common kestrel**

| Model    | Degree of freedom | logLik  | AICc   | Delta | Weight |
|----------|-------------------|---------|--------|-------|--------|
| 12367    | 6                 | -180.31 | 373.24 | 0     | 0.09   |
| 123678   | 7                 | -179.21 | 373.25 | 0.01  | 0.09   |
| 123567   | 7                 | -179.21 | 373.26 | 0.01  | 0.09   |
| 12567    | 6                 | -180.59 | 373.79 | 0.55  | 0.07   |
| 125      | 4                 | -182.82 | 373.94 | 0.70  | 0.06   |
| 1234678  | 8                 | -178.43 | 373.94 | 0.70  | 0.06   |
| 123467   | 7                 | -179.57 | 373.96 | 0.72  | 0.06   |
| 1235678  | 8                 | -178.45 | 373.98 | 0.74  | 0.06   |
| 1234567  | 8                 | -178.54 | 374.15 | 0.91  | 0.06   |
| 12357    | 6                 | -180.83 | 374.27 | 1.03  | 0.05   |
| 1257     | 5                 | -181.98 | 374.39 | 1.15  | 0.05   |
| 12345678 | 9                 | -177.73 | 374.82 | 1.58  | 0.04   |
| 1267     | 5                 | -182.20 | 374.83 | 1.59  | 0.04   |
| 15       | 3                 | -184.33 | 374.83 | 1.59  | 0.04   |
| 1357     | 5                 | -182.24 | 374.92 | 1.68  | 0.04   |
| 1235     | 5                 | -182.32 | 375.07 | 1.83  | 0.04   |
| 157      | 4                 | -183.43 | 375.15 | 1.91  | 0.03   |
| 125678   | 7                 | -180.19 | 375.22 | 1.97  | 0.03   |
| Null     | 1                 | -222.49 | 447.02 | -     | -      |

Term codes:

Land covered by forests = 1; Land covered by grasses = 2; Mean altitude = 3; Mean curvature = 4; Mean Slope = 5; Habitat diversity = 6; Land covered by shrubs = 7; Land covered by urbanized areas = 8



### Richness (all species)

| Model | Degree of freedom | logLik  | AICc   | Delta | Weight |
|-------|-------------------|---------|--------|-------|--------|
| 35    | 3                 | -162.34 | 330.86 | 0     | 0.27   |
| 135   | 4                 | -161.89 | 332.07 | 1.21  | 0.15   |
| 357   | 4                 | -161.92 | 332.13 | 1.28  | 0.14   |
| 358   | 4                 | -162.02 | 332.33 | 1.47  | 0.13   |
| 235   | 4                 | -162.14 | 332.57 | 1.71  | 0.11   |
| 345   | 4                 | -162.22 | 332.73 | 1.87  | 0.10   |
| 356   | 4                 | -162.28 | 332.85 | 2.00  | 0.10   |
| Null  | 1                 | -188.09 | 378.22 | -     | -      |

Term codes:

Land covered by forests = 1; Land covered by grasses = 2; Mean altitude = 3; Mean curvature = 4; Mean Slope = 5; Habitat diversity = 6; Land covered by shrubs = 7; Land covered by urbanized areas = 8

### Richness (excluding Egyptian vulture)

| Model | Degree of freedom | logLik  | AICc   | Delta | Weight |
|-------|-------------------|---------|--------|-------|--------|
| 34    | 3                 | -160.43 | 327.04 | 0     | 0.31   |
| 347   | 4                 | -160.12 | 328.53 | 1.49  | 0.15   |
| 134   | 4                 | -160.21 | 328.71 | 1.67  | 0.14   |
| 345   | 4                 | -160.22 | 328.73 | 1.69  | 0.14   |
| 346   | 4                 | -160.24 | 328.77 | 1.73  | 0.13   |
| 234   | 4                 | -160.25 | 328.79 | 1.75  | 0.13   |
| Null  | 1                 | -181.83 | 365.69 | -     | -      |

Term codes:

Land covered by forests = 1; Land covered by grasses = 2; Mean altitude = 3; Mean Slope = 4; Habitat diversity = 5; Land covered by shrubs = 6; Land covered by urbanized areas = 7

**Table S6.** Moran's index values for the response variable and the residuals of the averaged models of abundance and number of species (richness) of cliff-nesting raptors and the common raven in Teno, Tenerife, Canary Islands per 1x1 km cell.

|                                                           | Response variable |         | Residuals |         |
|-----------------------------------------------------------|-------------------|---------|-----------|---------|
|                                                           | Moran's I         | P-value | Moran's I | P-value |
| Abundance (all species)                                   | 0.0506            | <0.001  | 0.0025    | 0.239   |
| Abundance (excluding Egyptian Vulture)                    | 0.0439            | <0.001  | 0.0001    | 0.383   |
| Abundance (excluding common kestrel)                      | 0.0095            | 0.040   | 0.0453    | <0.001  |
| Abundance (excluding Egyptian vulture and common Kestrel) | -0.0045           | 0.749   | 0.0542    | <0.001  |
| Kestrel abundance                                         | 0.0543            | <0.001  | 0.0175    | 0.003   |
| Richness (all species)                                    | 0.0497            | <0.001  | -0.0134   | 0.4359  |
| Richness (excluding Egyptian vulture)                     | 0.0403            | <0.001  | -0.0100   | 0.7143  |
